# Supplementary material
Source: publisher figshare collection journal article supplement (https://gsapubs.figshare.com/ndownloader/files/29031057)
Supplement: Supplementary file 1 [file 29031057]

## Sheet: Sheet1
Table S2. Major element compositions (wt.%) of minerals
Sample	Mineral	SiO2	TiO2	Al2O3	Cr2O3	FeO	MnO	MgO	CaO	Na2O	K2O	NiO	Total	Mg#	Cr#
Jingyu lherzolite
17JY03	Ol	40.579	0.018	0.035	0.004	9.654	0.139	50.1425	0.1205	0	0.003	0.346	101.041	90.2514
	Opx	54.409	0.0785	4.4095	0.322	6.1985	0.1275	33.1765	0.8015	0.103	0.0025	0.0855	99.714	90.5125
	Cpx	52.59	0.332	5.495	0.704	3.072	0.079	16.079	20.082	1.232	0.002	0.048	99.715	90.3189
	Sp	0.064	0.171	54.551	11.74	11.672	0.116	20.707	0	0	0.006	0.355	99.382	75.9741	12.615
17JY18	Ol	40.018	0	0.027	0.016	10.825	0.176	49.327	0.103	0	0.028	0.339	100.859	89.0377
	Opx	56.245	0.174	2.982	0.506	5.311	0.143	34.428	0.737	0.072	0.003	0.09	100.691	92.0347
	Cpx	52.543	0.233	5.015	0.819	3.02	0.09	16.486	20.258	1.466	0	0.031	99.961	90.6805
	Sp	0.092	0.316	47.444	17.514	15.017	0.18	18.677	0.005	0.006	0	0.289	99.54	68.9138	19.8476
17JY27	Ol	39.958	0	0.016	0	9.185	0.117	49.818	0.115	0	0.002	0.364	99.575	90.6259
	Opx	54.505	0.082	4.3	0.387	5.833	0.125	33.337	0.899	0.13	0	0.124	99.722	91.0611
	Cpx	51.18	0.35	5.937	0.715	2.931	0.089	16.101	20.186	1.378	0	0.048	98.915	90.7335
	Sp	0.029	0.15	54.674	11.488	10.759	0.083	21.287	0	0	0.004	0.343	98.817	77.9084	12.3534
Jingyu harzburgite
17JY06	Ol	40.16	0	0	0.034	9.389	0.174	49.627	0.064	0.001	0.008	0.355	99.812	90.4043
	Opx	55.246	0.105	4.371	0.353	5.791	0.132	33.273	0.748	0.118	0.002	0.091	100.23	91.1042
	Cpx	52.087	0.189	3.477	1.043	2.349	0.083	17.005	22.406	0.982	0	0.028	99.649	92.8076
	Sp	0.004	0.149	55.257	12.466	10.231	0.081	20.803	0.035	0.006	0	0.359	99.391	78.375	13.144
17JY09	Ol	41.1915	0.015	0	0.015	8.53	0.1275	50.851	0.0525	0	0.011	0.39	101.184	91.3986
	Opx	56.037	0.155	3.155	0.49	5.275	0.143	33.886	0.742	0.081	0	0.073	100.037	91.968
	Cpx	52.458	0.664	4.813	1.224	2.397	0.058	16.15	20.688	1.6	0	0.04	100.092	92.3132
	Sp	0.011	0.091	50.118	15.573	11.276	0.103	20.441	0.006	0	0.007	0.32	97.946	76.3659	17.2481
17JY21	Ol	40.574	0	0	0	9.294	0.127	49.996	0.05	0	0	0.391	100.432	90.5557
	Opx	55.385	0.065	3.035	0.182	5.986	0.183	34.374	0.473	0.004	0	0.075	99.762	91.0996
	Cpx	53.139	0.216	3.805	0.371	2.263	0.072	16.816	23.485	0.816	0.024	0.043	101.05	92.98
	Sp	0	0.034	56.353	10.891	10.104	0.107	20.476	0.01	0	0	0.37	98.345	78.3181	11.4762
Kuandian lherzolite
17KD15	Ol	41.456	0	0	0.001	9.347	0.145	50.049	0.007	0	0.008	0.378	101.391	90.5161
	Opx	55.732	0.042	3.336	0.257	5.952	0.128	33.933	0.394	0	0	0.078	99.852	91.0409
	Cpx	52.726	0.594	6.03	0.754	2.15	0.094	15.268	21.898	1.483	0	0.028	101.025	92.6782
	Sp	0	0.057	57.301	10.436	10.062	0.113	20.562	0.004	0	0	0.366	98.901	78.4597	10.8868
17KD19	Ol	41.644	0.014	0.012	0.033	9.174	0.147	50.509	0.082	0.002	0	0.381	101.998	90.7523
	Opx	55.39	0.121	5.243	0.475	5.763	0.123	33.025	0.971	0.136	0.015	0.1	101.362	91.0828
	Cpx	52.495	0.404	7.015	0.816	2.905	0.059	16.052	19.859	1.711	0.007	0.056	101.379	90.7827
	Sp	0.012	0.035	56.059	10.521	10.103	0.104	20.408	0	0	0	0.359	97.601	78.2633	11.1815
17KD29	Ol	41.742	0.005	0.005	0.032	8.809	0.155	50.998	0.072	0.007	0	0.364	102.189	91.1654
	Opx	55.637	0.088	4.26	0.57	5.57	0.128	33.559	0.812	0.109	0	0.089	100.822	91.4815
	Cpx	52.58	0.273	5.717	1.106	2.567	0.086	16.287	19.963	1.452	0.006	0.04	100.077	91.8759
	Sp	0.022	0.137	49.004	18.778	11.049	0.139	19.915	0.006	0	0.001	0.314	99.365	76.2623	20.4482
Kuandian harzburgite
17KD04	Ol	41.315	0.004	0	0.004	9.114	0.112	50.421	0.082	0	0.005	0.33	101.387	90.7927
	Opx	55.102	0.065	4.583	0.517	5.779	0.166	33.443	0.926	0.074	0	0.111	100.766	91.1621
	Cpx	52.212	0.202	5.309	0.778	2.803	0.122	16.925	21.032	1.032	0.007	0.044	100.466	91.4985
	Sp	0.043	0.093	53.121	14.756	11.189	0.114	20.029	0.026	0	0.003	0.351	99.725	76.1375	15.7066
17KD25	Ol	40.926	0.009	0	0.032	9.42	0.137	50.218	0.073	0	0.005	0.374	101.194	90.4782
	Opx	54.848	0.095	4.945	0.388	5.925	0.145	33.24	0.852	0.138	0	0.105	100.681	90.9088
	Cpx	52.236	0.353	6.441	0.707	2.959	0.118	16.053	20.007	1.556	0	0.036	100.466	90.6279
	Sp	0	0.05	56.171	10.9	10.003	0.129	20.767	0.013	0.028	0	0.327	98.388	78.7256	11.5175
Kuandian ol-websterite
17KD12	Ol	40.478	0	0.02	0.01	9.097	0.133	50.261	0.055	0	0	0.37	100.424	90.7817
	Opx	54.011	0.096	4.648	0.466	5.855	0.136	33.473	0.822	0.06	0.008	0.105	99.68	91.0636
	Cpx	52.255	0.262	5.655	0.75	2.718	0.088	16.226	21.205	1.222	0.004	0.067	100.452	91.4096
	Sp	0.045	0.148	54.265	12.026	10.717	0.106	20.777	0	0	0	0.367	98.451	77.5563	12.9419
